# Supplementary material
Source: PubMed Central journal article supplement (PMC5841863)
Supplement: jciinsight-2-94920-s001.pdf [file jciinsight-2-94920-s001.pdf]

# Dietary potassium regulates vascular calcification and arterial stiffness

Yong Sun<sup>1#</sup>, Chang Hyun Byon<sup>1#</sup>, Youfeng Yang<sup>1</sup>, Wayne E Bradley<sup>2</sup>, Louis J Dell'Italia<sup>2</sup>, Paul W Sanders<sup>2,3</sup>, Anupam Agarwal<sup>2,3</sup>, Hui Wu<sup>4</sup>, Yabing Chen<sup>1,3</sup>

Departments of Pathology<sup>1</sup>, Medicine<sup>2</sup>, and Pediatric Dentistry<sup>4</sup>, University of Alabama at Birmingham; Research Department<sup>3</sup>, Veterans Affairs Birmingham Medical Center, Birmingham, AL

# These authors contribute equally.

Running Title: Potassium regulates VSMC calcification

## SUPPLEMENTAL FIGURE I

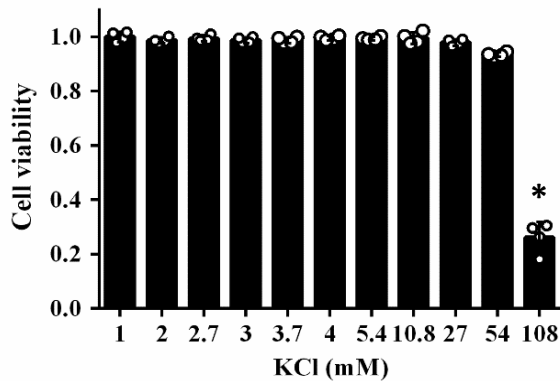

**Supplemental Figure I. Effects of extracellular potassium on the viability vascular smooth muscle cells (VSMC).** VSMC were cultured in osteogenic media with increased amounts of potassium, 1 to 108 mM, for 3 days and cell viability was determined by MTS assay. Results from four independent experiments performed in duplicate are shown. Bar values are means  $\pm$  SD (n=4, \* $p$ <0.05 compared with potassium at 5.4 mM). Statistical analysis was performed by one-way ANOVA followed by a Student-Newman-Keuls test.

## SUPPLEMENTAL FIGURE II

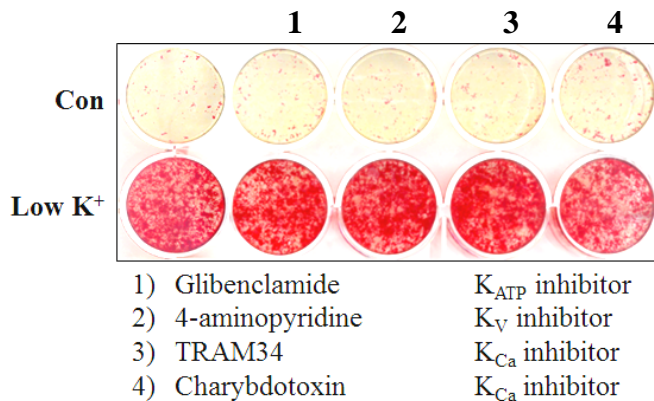

**Supplemental Figure II. Inhibition of  $K_{ATP}$ ,  $K_V$ , and  $K_{Ca}$  signaling did not affect low potassium-induced VSMC calcification.** VSMC were cultured in osteogenic media containing 5.4 mM (Con) or 3.7 mM (Low  $K^+$ ) potassium with the indicated potassium channel inhibitors: 1) glibenclamide (5  $\mu$ M), 2) 4-aminopyridine (0.5 mM), 3) TRAM34 (5 nM) or 4) charybdotoxin (10  $\mu$ M) for 3 weeks. Calcification was determined by Alizarin Red staining. Representative images from three independent experiments are shown.

**SUPPLEMENTAL FIGURE III**

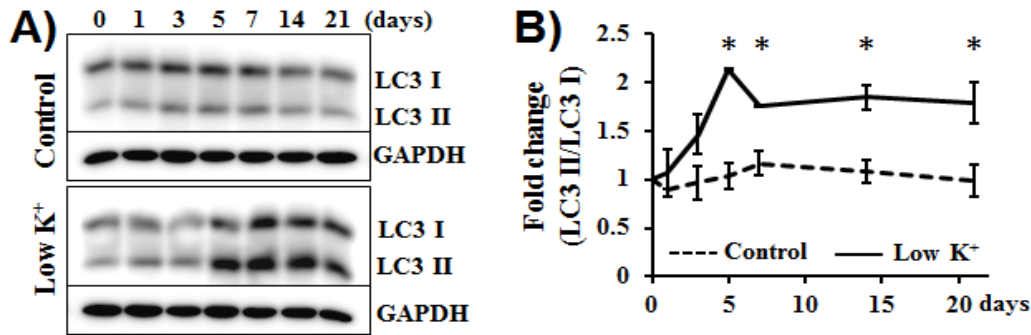

**Supplemental Figure III. Low potassium enhanced autophagy in VSMC.** VSMC were cultured in osteogenic media with control or low potassium up to 3 weeks. **A)** Western blot analysis of the expression of autophagic marker, the microtubule-associated protein 1 light chain 3 (LC3), in the cytoplasmic form (LC3 I) and conjugated form (LC3 II). The expression of GAPDH was used as a loading control. Representative blots from three independent experiments are shown. **B)** Quantitative analysis of the LC3 II/LC3 I ratio, determined by densitometry and analyzed using ImageJ software (NIH Bethesda, MD) (n=3, \*p<0.05 compared with potassium at 5.4 mM). Statistical analysis was performed by one-way ANOVA followed by a Student-Newman-Keuls test.

**Supplemental Table 1. Serum electrolytes and other biochemical parameters in control and low dietary potassium-fed mice (\*p<0.05, compared with control group)**

|                  | Unit    | Low K <sup>+</sup> |      | Control |      | High K <sup>+</sup> |      |
|------------------|---------|--------------------|------|---------|------|---------------------|------|
|                  |         | mean               | SD   | mean    | SD   | mean                | SD   |
| Na <sup>+</sup>  | (mEq/L) | 152.2              | 2.1  | 151.0   | 1.7  | 155                 | 2.4  |
| K <sup>+</sup>   | (mEq/L) | 3.70*              | 0.21 | 4.27    | 0.23 | 4.73*               | 0.15 |
| Cl <sup>-</sup>  | (mEq/L) | 111.4              | 0.9  | 111.3   | 2.1  | 116.3               | 3.6  |
| Ca <sup>2+</sup> | (mg/dL) | 9.78               | 0.76 | 9.10    | 0.26 | 11.7                | 3.1  |
| Mg <sup>2+</sup> | (mg/dL) | 2.96               | 0.34 | 2.73    | 0.15 | 3.53                | 1.24 |
| BUN              | (mg/dL) | 29.0               | 4.3  | 28.0    | 1.73 | 34.3                | 9.6  |
| Creatinine       | (mg/dL) | 0.23               | 0.15 | 0.25    | 0.07 | 0.36                | 0.11 |
